# Supplementary material for: Drought cascades across multiple systems in Central Asia identified based on the dynamic space-time motion approach
Source: Copernicus journal article supplement (doi:10.5194/hess-2023-140), 2023-06-14
Supplement: Supplementary file 1 [file hess-2023-140-supplement.pdf]

## Supplement

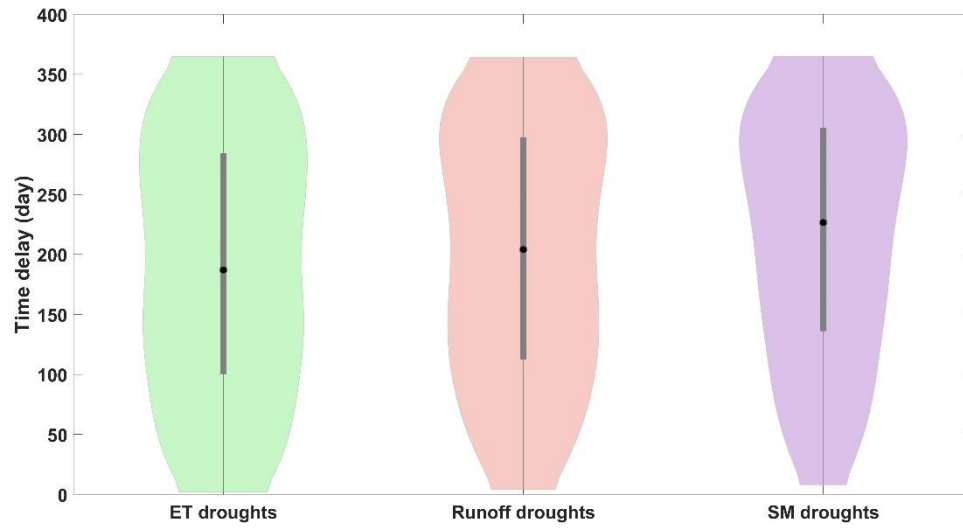

Figure S1. Violin boxplot of time delay for the ET, Runoff, and SM drought in all cascading drought events
